# Supplementary material
Source: publisher figshare collection journal article supplement (https://acs.figshare.com/ndownloader/files/5194441)

<sup>13</sup>C NMR spectra of compounds 11-14 (from top to bottom; D<sub>2</sub>O, 500 MHz)

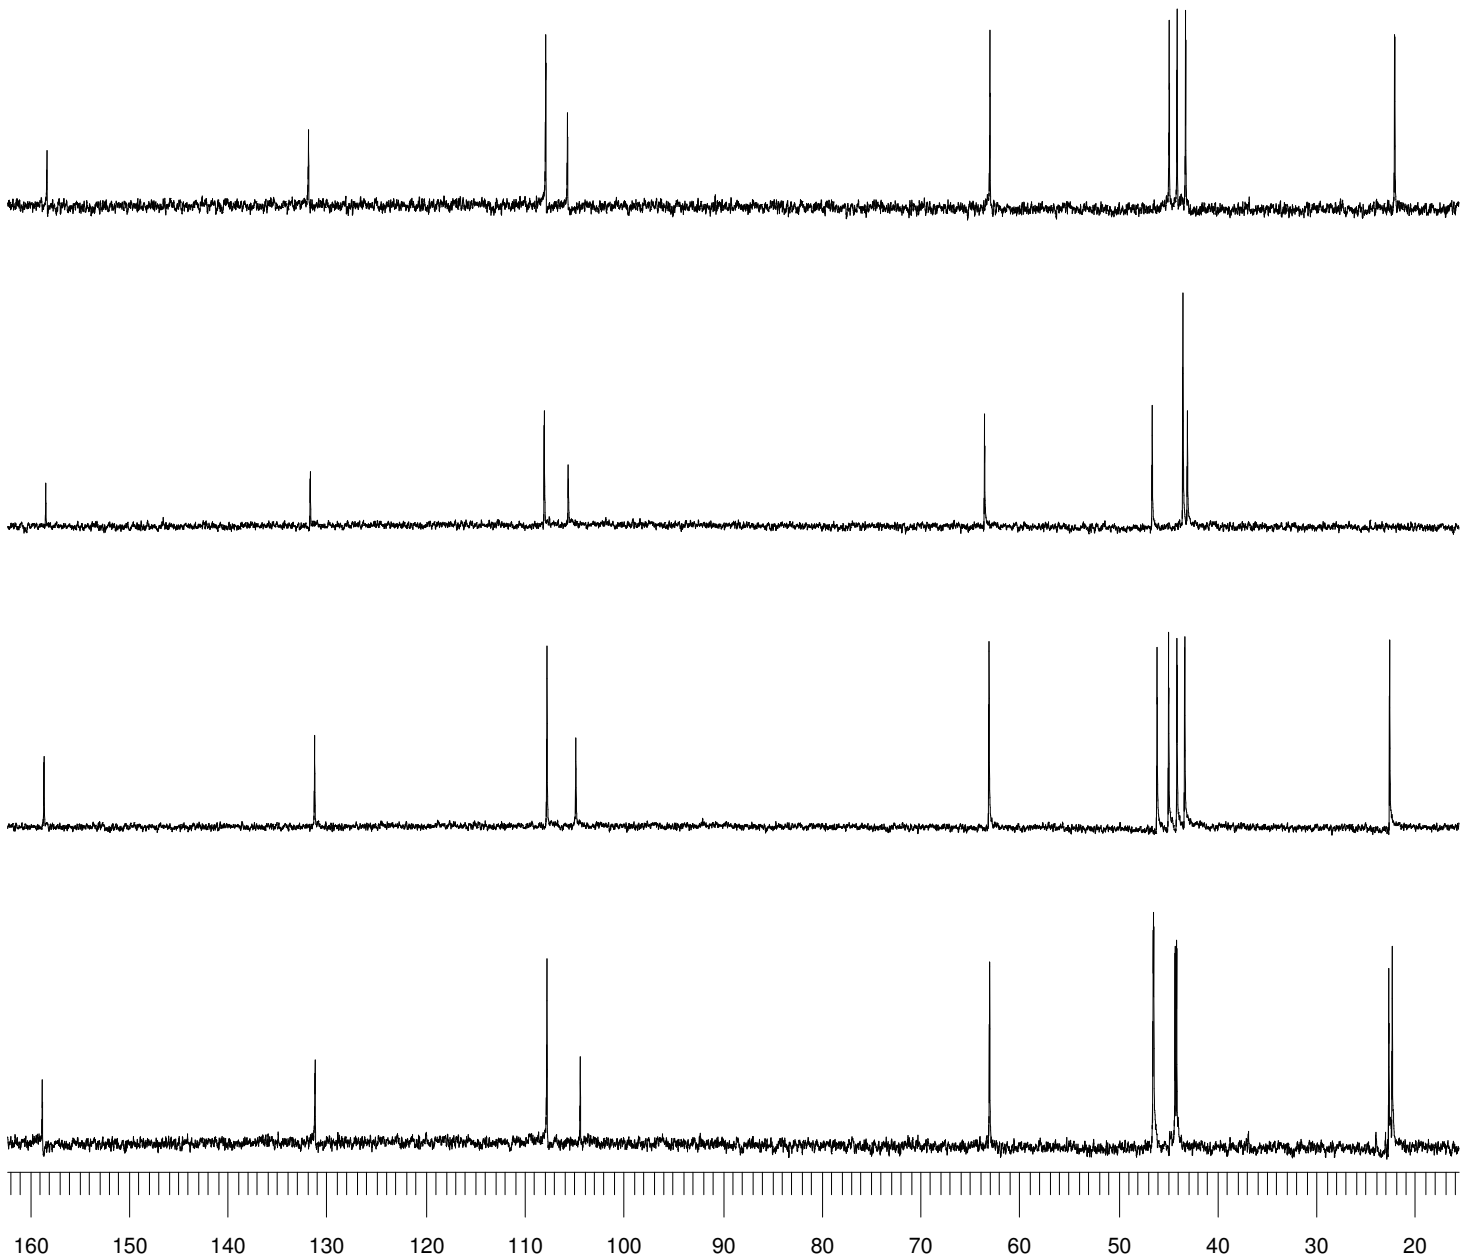

Supplement: Supplementary file 1 [file 5194441]
